# Supplementary material
Source: PubMed Central journal article supplement (PMC3259651)
Supplement: supp_M800487200_Figure_S1.pdf [file supp_M800487200_Figure_S1.pdf]

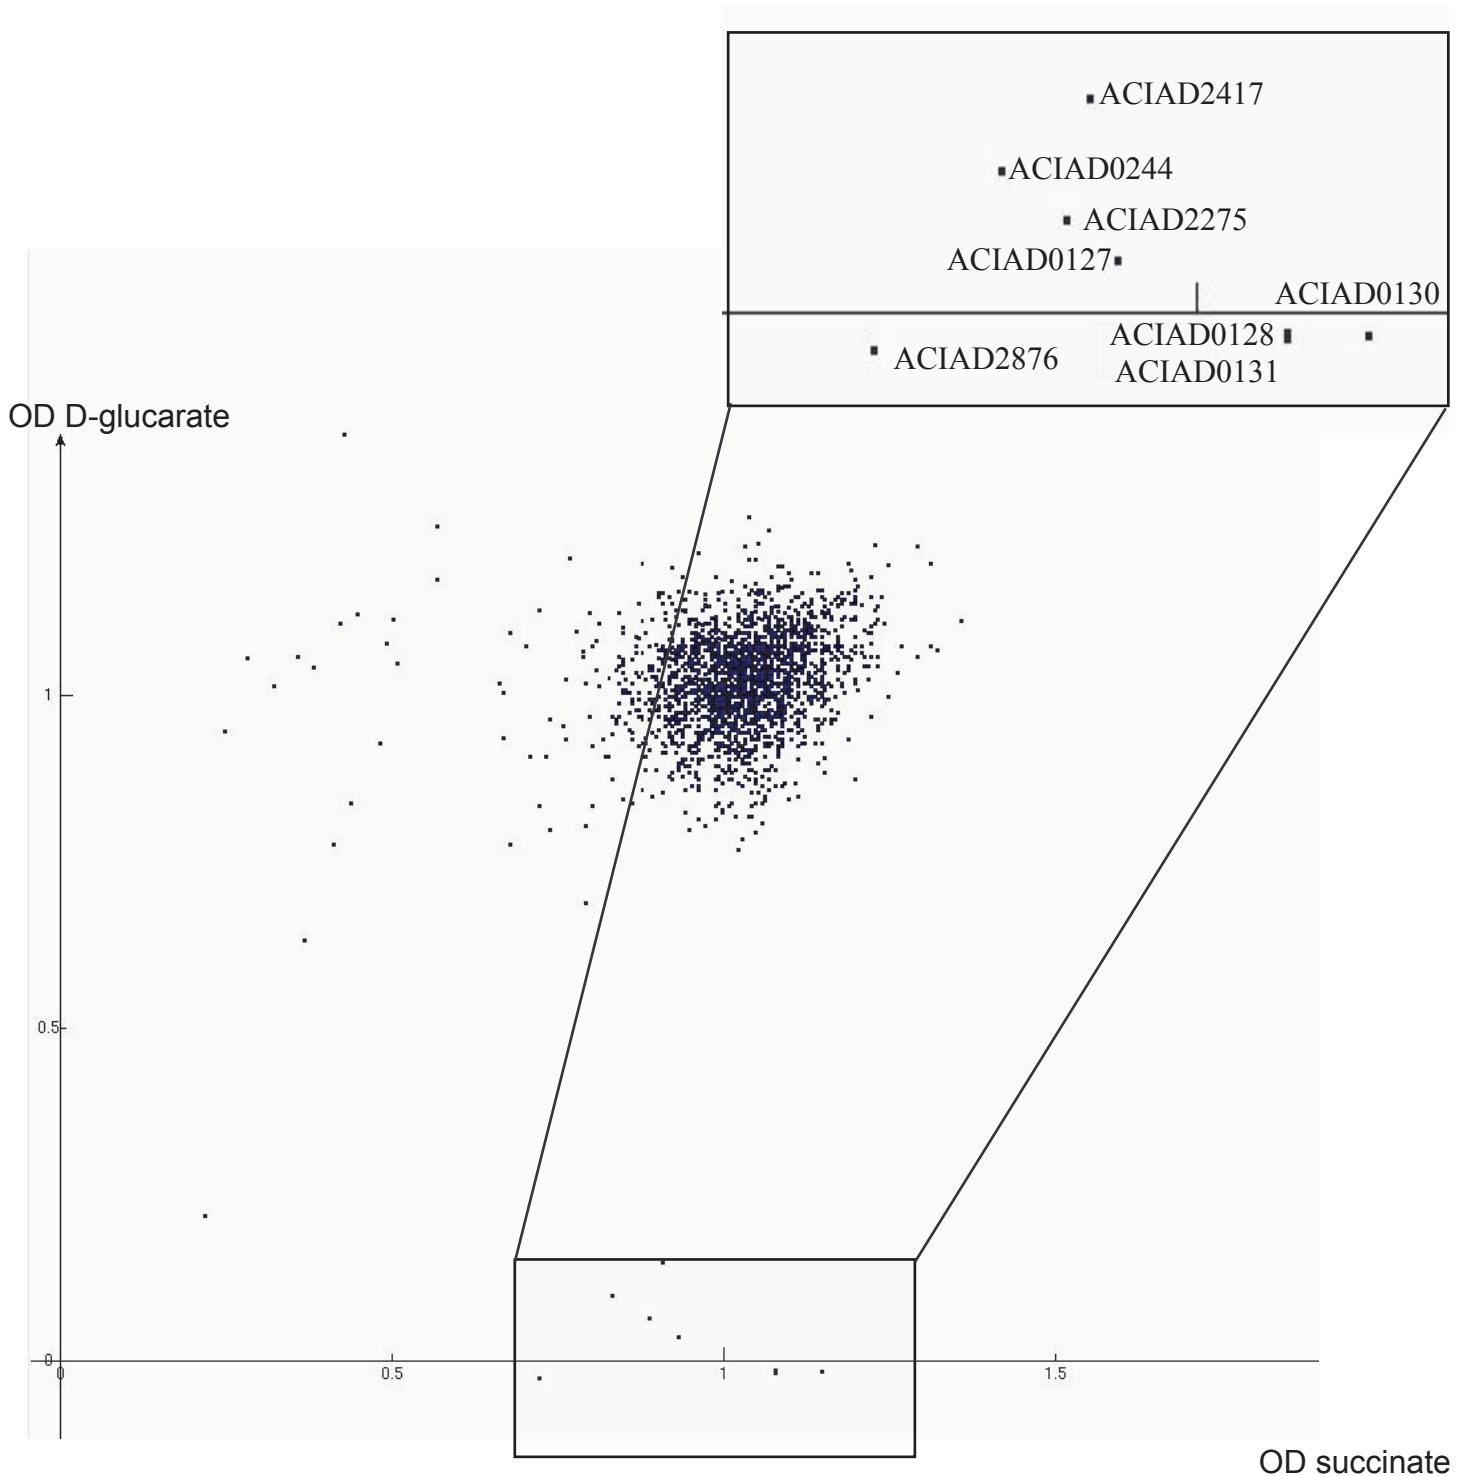

Supplemental Figure 1. Profiling gene contribution for growth on succinate and D-glucarate. A total of 2435 mutants from the *A. baylyi* ADP1 collection were grown for 24 hours in minimal medium supplemented with either succinate or D-glucarate (20 mM). The squared area represents mutants growing poorly on D-glucarate while presenting significant growth on succinate.
