# Supplementary material
Source: PubMed Central journal article supplement (PMC3259651)
Supplement: supp_M800487200_TableS1.pdf [file supp_M800487200_TableS1.pdf]

Table S1. Primer list used in this study.

| Primers                        | Sequences                              |
|--------------------------------|----------------------------------------|
| Co-transcription analysis      |                                        |
| 127_128: fwd                   | 5'-CACCGAATTTATCCAGTGCCAACC-3'         |
| 127_128: rev                   | 5'-TACCAGTCATGATTTAAATGCGTAG-3'        |
| 128_130: fwd                   | 5'-AAATTTGATCATAAAAAACCATGTC-3'        |
| 128_130: rev                   | 5'-GCCATTCGAGACGTTTTGCATAAGA-3'        |
| 130_131: fwd                   | 5'-CTTGTTGAAAGTTGTCCAAATCTAA-3'        |
| 130_131: rev                   | 5'-TAAAAATCACCACGACGCAAGAGTT-3'        |
| 131_132: fwd                   | 5'-ATTGAGCGTTTCTTGCGTCCCGTCT-3'        |
| 131_132: rev                   | 5'-AAAAGTTCCAATCCCATGTCGTGTC-3'        |
| Quantitative PCR analysis      |                                        |
| ACIAD_0126: fwd                | 5'-CTGTAAGAGATTCTAACGGCTGTG-3'         |
| ACIAD_0126: rev                | 5'-AGATGAGGCAATTATTCGCTATGG-3'         |
| ACIAD0127: fwd                 | 5'-TGACCGAGCAACCATC-3'                 |
| ACIAD0127: rev                 | 5'-TATCCAGTAGCCAACCG-3'                |
| ACIAD0128: fwd                 | 5'-TGACACCAGAGGCAATACAAC-3'            |
| ACIAD0128: rev                 | 5'-CAGCATAGGCAAGCACTCC-3'              |
| ACIAD0130: fwd                 | 5'-TGGCTGGCTCCGTATG-3'                 |
| ACIAD0130: rev                 | 5'-CTTCCTGACTCGCTTCTG-3'               |
| ACIAD0131: fwd                 | 5'-GGTCGCTGCTCTTGCC-3'                 |
| ACIAD0131: rev                 | 5'-TGCCGCCTGAATCAACG-3'                |
| ACIAD0132: fwd                 | 5'-GCCGTATTTCTTGCTTCTG-3'              |
| ACIAD0132: rev                 | 5'-TTGACTTCACCCTTGCC-3'                |
| Recombinant protein production |                                        |
| <i>GDH</i> -fwd                | 5'-GCAGCCTCAACACCAATCATTTCAG-3'        |
| <i>GDH</i> -rev                | 5'-TTAACGGACAAGACATGGTTTTTTATG-3'      |
| <i>KDGDH</i> -fwd              | 5'-GATGCTCTTGAATTAATAAATATTGTTTCTG-3'  |
| <i>KDGDH</i> -rev              | 5'-TACTGTGGTCCAAGCGTTGC-3'             |
| <i>αKGSADH_ADPI</i> -fwd       | 5'-AGCGAGAATAACGGTAAACAGTTTATCAATG-3'  |
| <i>αKGSADH_ADPI</i> -rev       | 5'-TTAATTTTGTGTTAATACACCATTGACCAAGC-3' |
| <i>αKGSADH_PP</i> -fwd         | 5'-CCTGAGATCCTCGGCCAT-3'               |
| <i>αKGSADH_PP</i> -rev         | 5'-TCAGATCGCCCCGTCCTC-3'               |
